# Supplementary material for: Enhanced N2affinity of 1T-MoS2with a unique pseudo-six-membered ring consisting of N–Li–S–Mo–S–Mo for high ambient ammonia electrosynthesis performance
Source: Royal Society of Chemistry journal article supplement (doi:10.1039/d0ta10696h), 2020-12-09
Supplement: d0ta10696h1.pdf [file d0ta10696h1.pdf]

**Enhanced N<sub>2</sub> Affinity of 1T-MoS<sub>2</sub> with Unique Pseudo Six-membered Ring Consisting of  
N—Li—S—Mo—S—Mo for High Ambient Ammonia Electrosynthesis Performance**

Shivaraj B. Patil,<sup>1#</sup> Hung-Lung Chou,<sup>2#</sup> Yu-Mei Chen,<sup>1</sup> Shang-Hsien Hsieh,<sup>3</sup> Chia-Hao Chen,<sup>3</sup>  
Chia-Che Chang,<sup>1</sup> Shin-Ren Li,<sup>1</sup> Yi-Cheng Lee,<sup>1</sup> Ying-Sheng Lin,<sup>1</sup> Hsin Li,<sup>1</sup> Yuan Jay Chang,<sup>1</sup>  
Ying-Huang Lai,<sup>1</sup> Di-Yan Wang<sup>1\*</sup>

<sup>1</sup> Department of Chemistry, Tunghai University, Taichung 40704, Taiwan

<sup>2</sup> Graduate Institute of Applied Science and Technology, National Taiwan University of Science  
and Technology, Taipei 10607, Taiwan

<sup>3</sup> National Synchrotron Radiation Research Center, Hsinchu 30076, Taiwan

<sup>#</sup>Shivaraj B. Patil and Hung-Lung Chou are contributed equally to this work

Corresponding author: [diyanwang@thu.edu.tw](mailto:diyanwang@thu.edu.tw)

**Table S1.** Adsorption energies and optimized geometries calculation of H in MoS<sub>2</sub> with Li and without Li systems

|                                              | $E_{ad}$<br>(eV) | $E_{ad}$<br>(eV)  | Distance<br>(S-H) (Å) |
|----------------------------------------------|------------------|-------------------|-----------------------|
| S site of MoS <sub>2</sub><br>(with Li-S)    | 0.492            | 0.47 <sup>3</sup> | 1.381<br>(± 0.02 Å)   |
| S site of MoS <sub>2</sub><br>(without Li-S) | 0.034            | 0.03 <sup>3</sup> | 1.383<br>(± 0.02 Å)   |

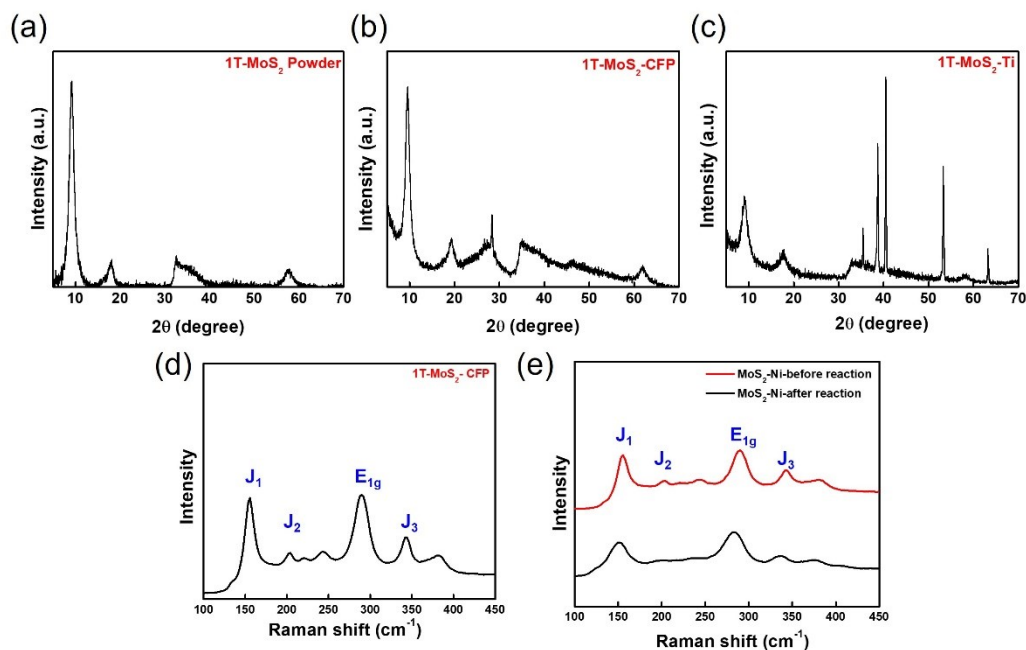

**Figure S1.** (a-c) XRD patterns of 1T-MoS<sub>2</sub>-powder, 1T-MoS<sub>2</sub>-CFP and 1T-MoS<sub>2</sub>-Ti, respectively; (d-e) Raman spectra of 1T-MoS<sub>2</sub>-CFP and 1T-MoS<sub>2</sub>-Ni, respectively. Similar kind of XRD pattern having sharp peaks was also obtained for 1T-MoS<sub>2</sub> powder when synthesized without any substrates. Therefore, it is evident that Ni foil exhibits dual nature, that is, acting as suitable substrate and amorphization agent. Meanwhile, Raman spectra confirms the formation of distorted amorphous 1T-MoS<sub>2</sub> and maintains same phase after the reactions also.

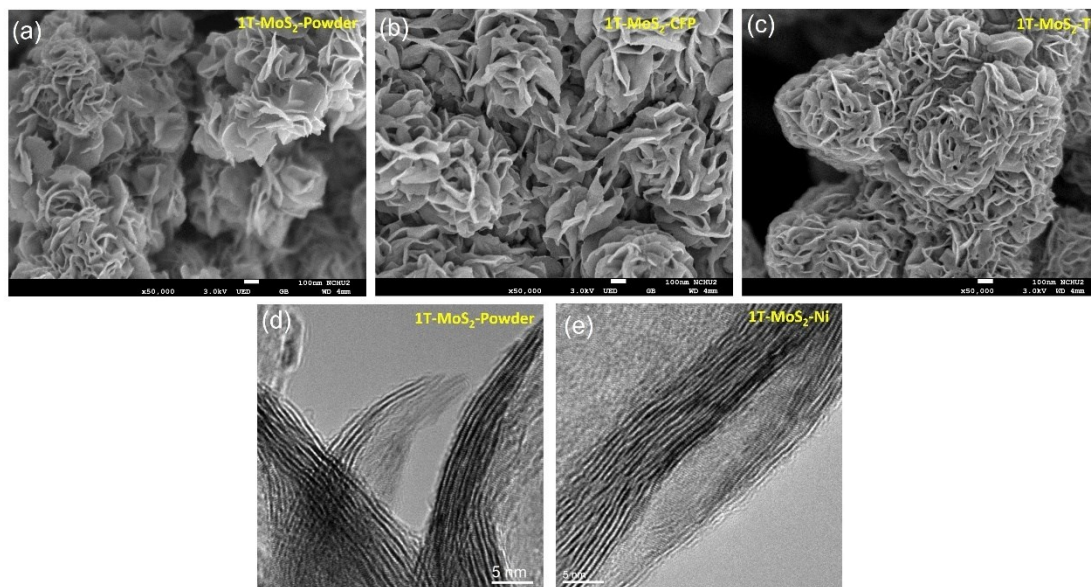

**Figure S2.** (a-c) SEM images of 1T-MoS<sub>2</sub>-powder, 1T-MoS<sub>2</sub>-CFP and 1T-MoS<sub>2</sub>-Ti, respectively; (d-e) HR-TEM image of 1T-MoS<sub>2</sub>-powder and 1T-MoS<sub>2</sub>-Ni, respectively. These 1T-MoS<sub>2</sub> catalysts exhibited high crystalline beautiful nanoflower morphology. FE-SEM images further substantiate the significant role of Ni in amorphization of 1T-MoS<sub>2</sub>. The d-spacing calculated from the HR-TEM corresponds to 1T phase of MoS<sub>2</sub>. HR-TEM image reveals the formation of defective amorphous 1T-MoS<sub>2</sub>.

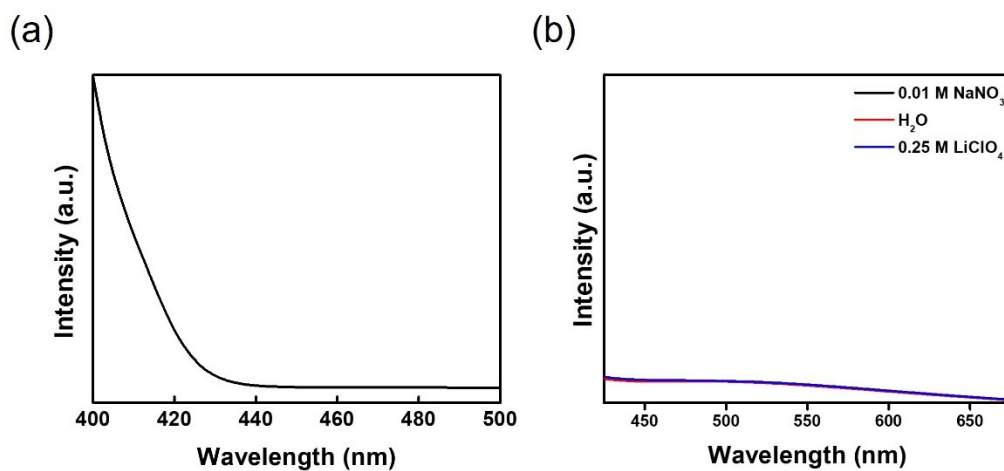

**Figure S3.** (a) UV-vis absorption spectra of the electrolyte stained with Watt and Chrisp indicator after NRR electrolysis using 1T-MoS<sub>2</sub>-Ni at -0.3 V. The result rules out the formation of hydrazine and signifies the formation of NH<sub>3</sub> only. (b) UV-vis absorption spectra of the electrolytes stained with Griess reagent (equal volumes of electrolyte and reagent were mixed and read the absorbance at 540 nm after 15 min).

To validate the results are real, many controlled experiments were carried out. **Figure S10 (a)** shows UV-vis absorption spectra of pure electrolyte with purging  $N_2$  and Ar gas stained with indophenol indicator. **Figure S10 (b)** shows the gas chromatography of  $N_2$  gas. It was found that there is no contamination either from the electrolyte or gas. **Figure 11S (a & b)** show time dependent current curves and corresponding UV-Vis spectra of 1T-MoS<sub>2</sub>-Ni using carbon as a counter electrode. The efficiency remains almost same signifying the non-interference of Pt ions. **Figure 11S (c & d)** show time dependent current curves and corresponding UV-Vis spectra of 1T-MoS<sub>2</sub>-Ni using Li<sub>2</sub>SO<sub>4</sub> electrolyte. Unbowed efficiency indicates the insignificant effect of anions on the performance of 1T-MoS<sub>2</sub>-Ni. No ammonia was detected when Ni with and without catalyst exposed to chronoamperometric tests in Ar atmosphere [**Figure 11S (e & f)**] confirming that no contamination originated from electrode.

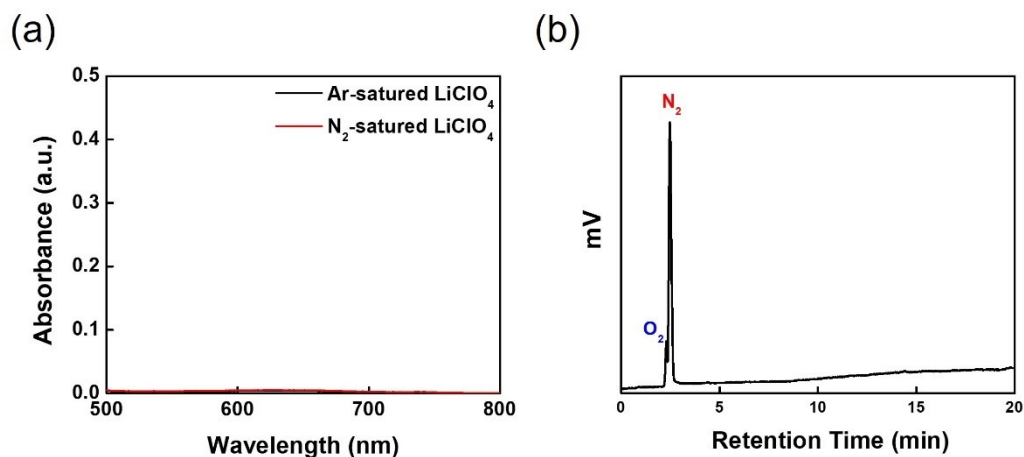

**Figure S4. (a)** UV-vis absorption spectra of pure electrolyte with purging  $N_2$  and Ar gas stained with indophenol indicator. It was found that there is no contamination either from the electrolyte. **(b)** Gas chromatography of  $N_2$  gas.

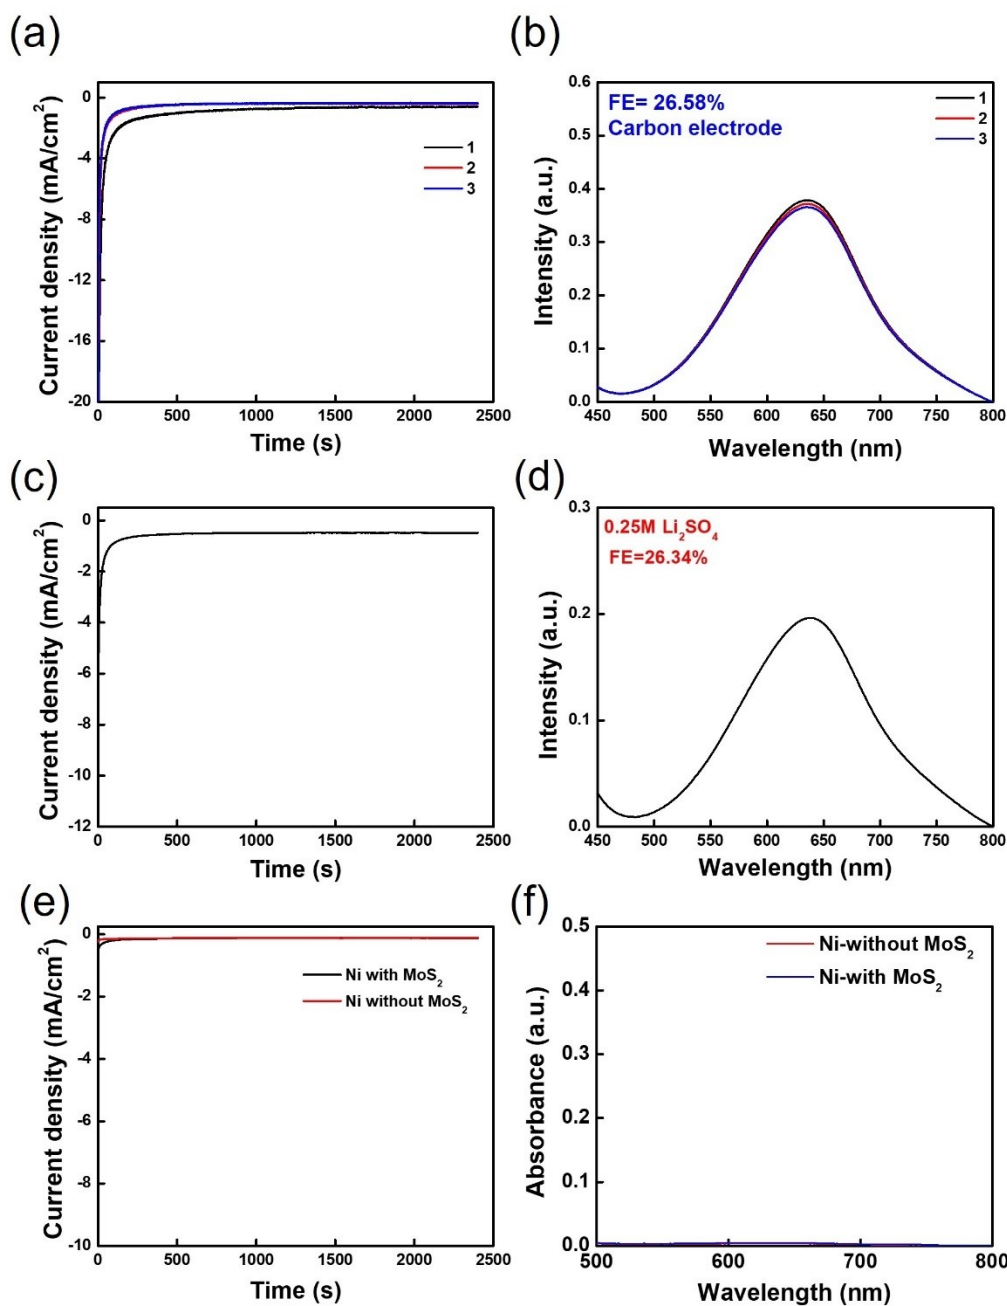

**Figure S5.** (a & b) Time dependent current curves and corresponding UV-vis absorption spectra of 1T-MoS<sub>2</sub>-Ni for consecutive cycles using carbon rod as a counter electrode to study the effect of Pt counter electrode in H-type cell; (c & d) Time dependent current curves and corresponding UV-vis absorption spectra of 1T-MoS<sub>2</sub>-Ni operated in 0.25 M Li<sub>2</sub>SO<sub>4</sub> electrolyte; (e & f) Time dependent current curves (Ar atmosphere) and corresponding UV-vis absorption spectra of Ni with and without MoS<sub>2</sub> at -0.3V vs RHE.

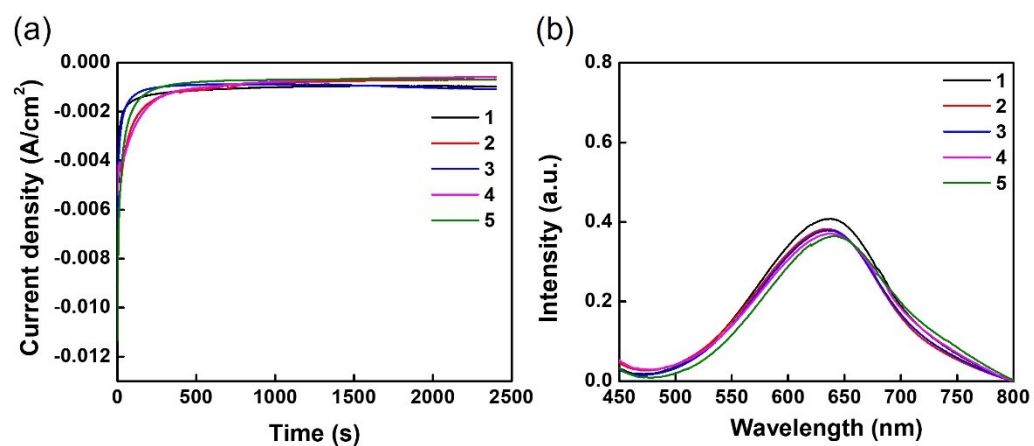

**Figure S6.** (a) Time dependent current curves of 1T-MoS<sub>2</sub>-Ni for consecutive cycles. (b) UV-vis absorption spectra of the electrolyte stained with indophenol indicator after NRR electrolysis using 1T-MoS<sub>2</sub>-Ni for consecutive cycles.



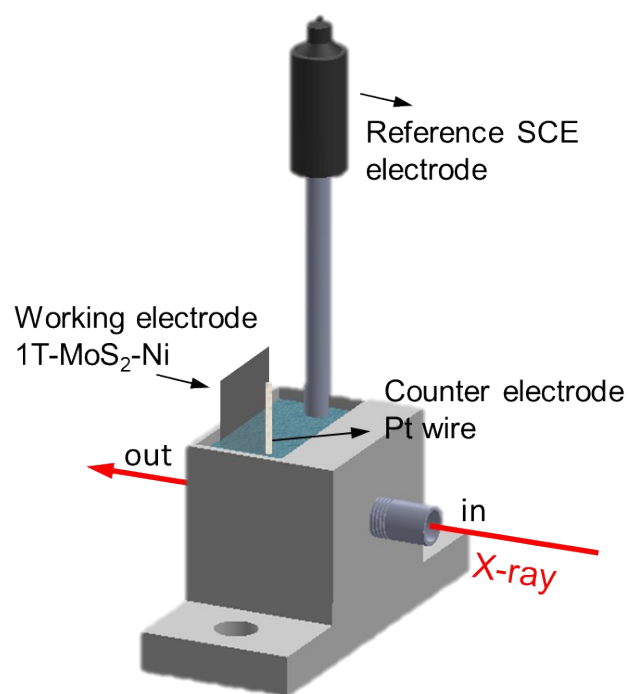

**Figure S7.** The setup of electrochemical reaction of in-situ XRD- measurement.

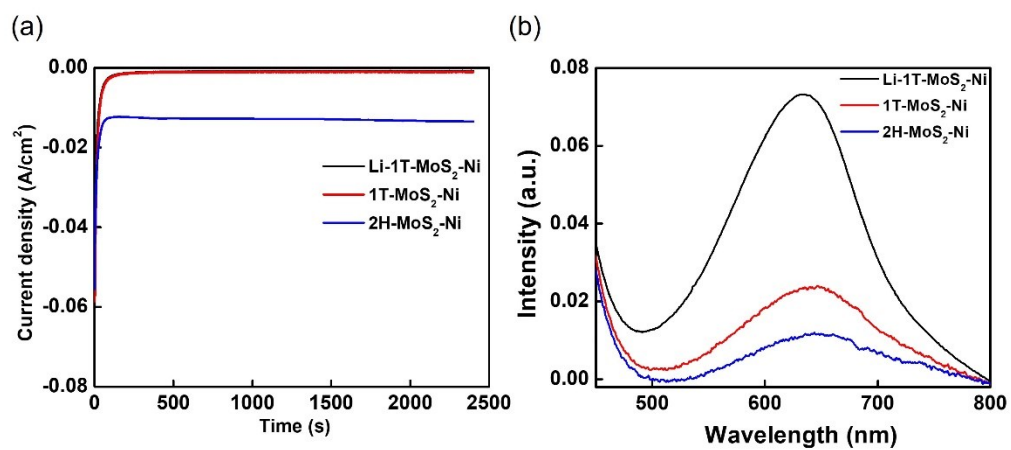

**Figure S8.** (a) Time dependent current curves of different catalysts operated in 0.25 M Na<sub>2</sub>SO<sub>4</sub> electrolyte. (b) UV-vis absorption spectra of the corresponding electrolytes stained with indophenol indicator.

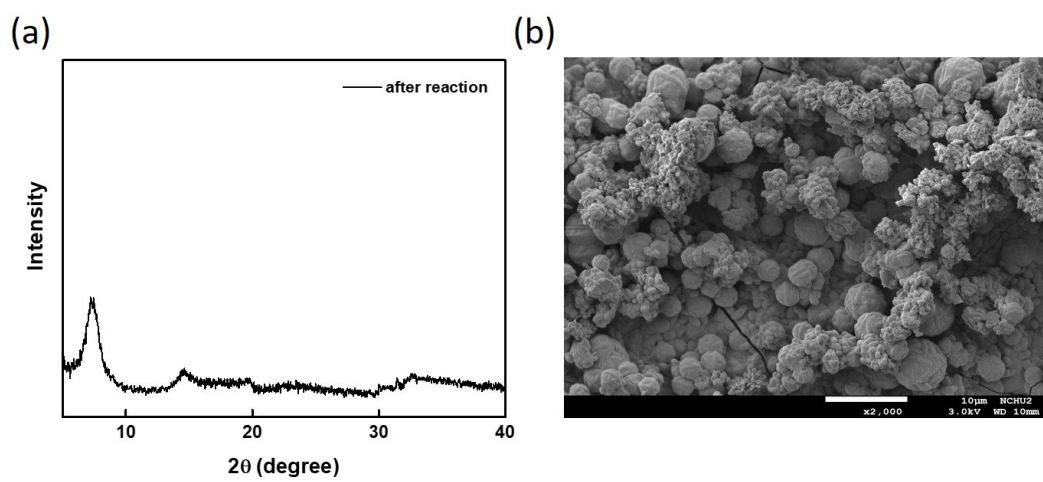

**Figure S9:** (a-b) XRD pattern and SEM image of 1T-MoS<sub>2</sub> after NRR, respectively.

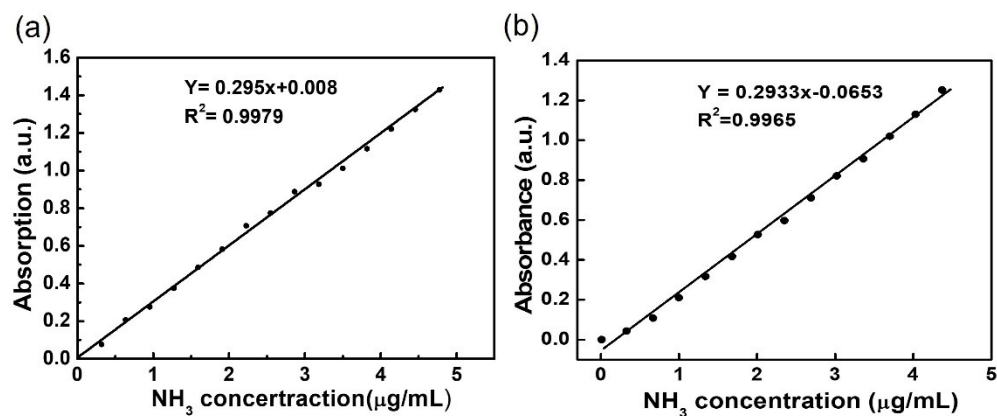

**Figure S10.** The calibration curves used to quantify the  $\text{NH}_3$  generated during electrolysis for (a)  $\text{LiClO}_4$  and (b)  $\text{Na}_2\text{SO}_4$  electrolytes, respectively.

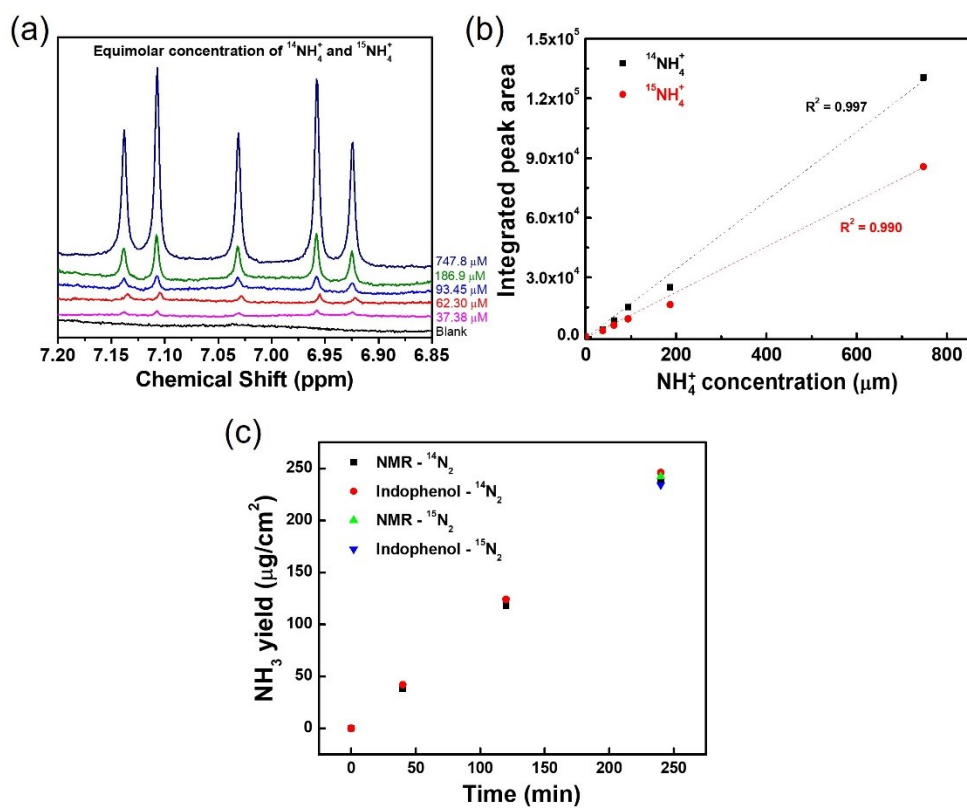

**Figure S11.** (a) NMR spectra of equimolar concentrations of  $^{14}\text{NH}_4^+$  and  $^{15}\text{NH}_4^+$ . The slight deviation of chemical shift can be attributed to differences in pH, volume and/or temperature. (b) NMR based calibration curve used to quantify the  $\text{NH}_3$  generated during electrolysis. (c)  $\text{NH}_3$  yield obtained by both indophenol and NMR over different periods.

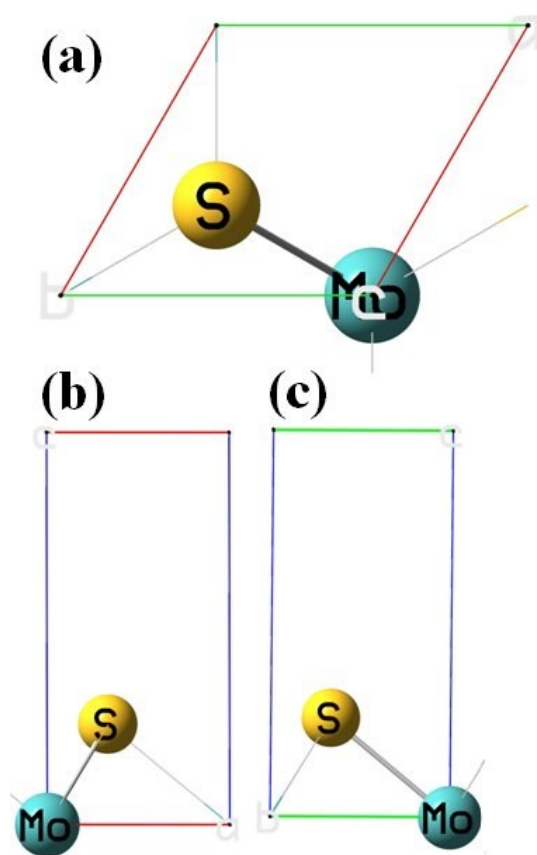

**Figure S12.** The models of unit cell of 1T-MoS<sub>2</sub> in the (a) top-view, and (b) side-view (along x-axis), and (c) side-view of MoS<sub>2</sub> (along y-axis).

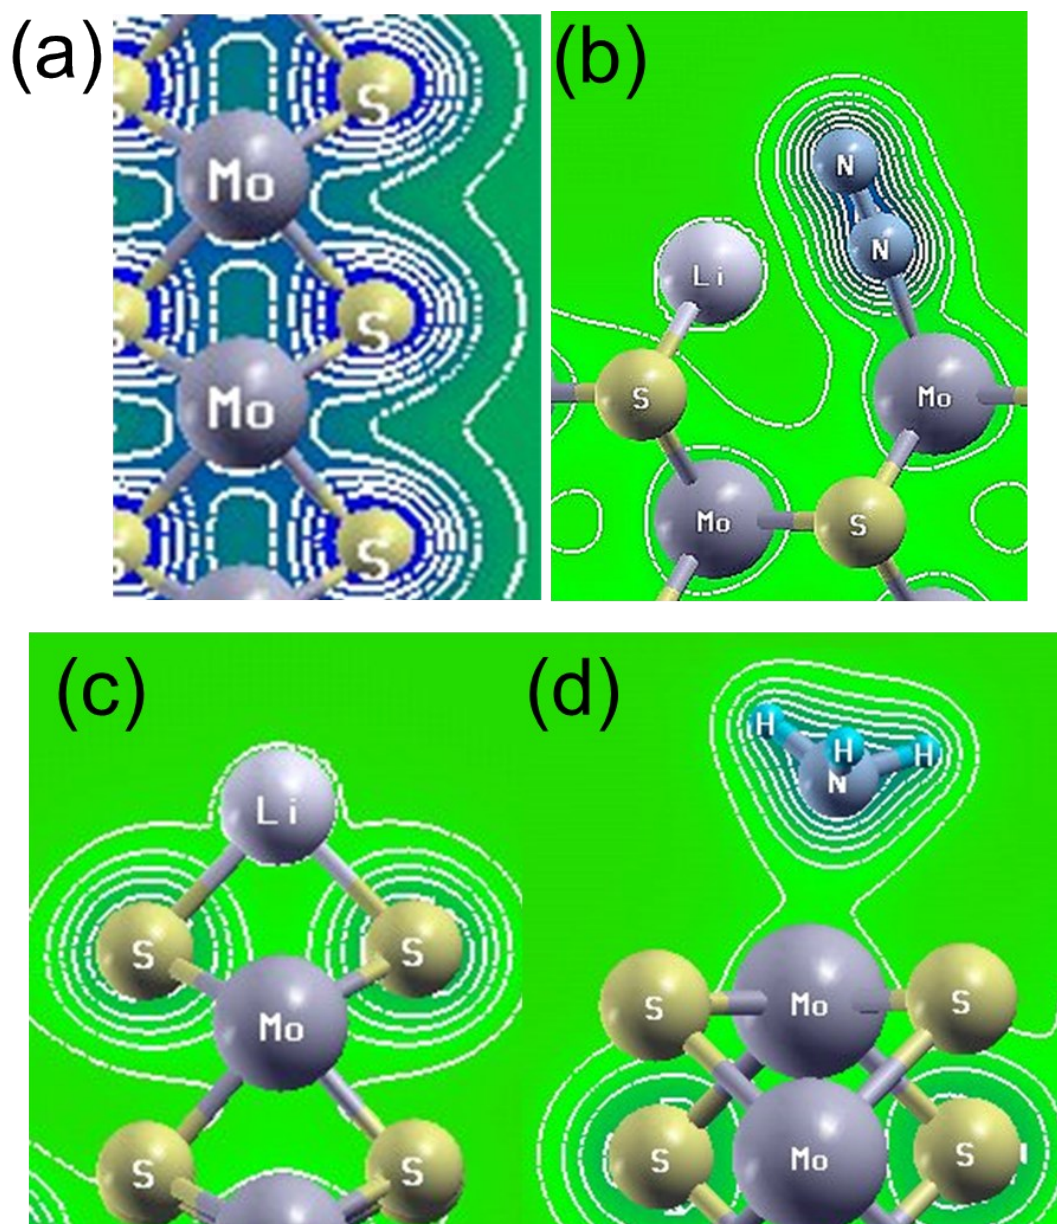

**Figure S13.** (a) The electron contour map obtained from the top-view. (b) The key structures of intermediates N=N adsorbed with Li-S on MoS<sub>2</sub> of the PED. (c) The key structures of intermediates Li adsorbed on bridge-S on MoS<sub>2</sub>. (d) The electron contour map of Mo-NH<sub>3</sub> from the side-view.

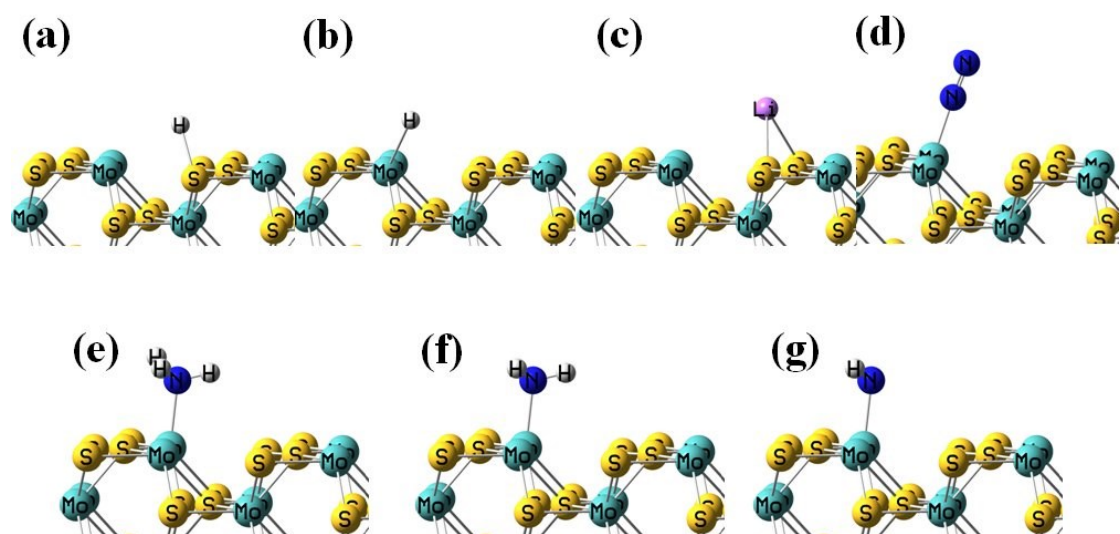

**Figure S14.** The Side-view of the 1T-MoS<sub>2</sub> edges. (a) H\* adsorption on the S-edge site and (b) H\* adsorption on the Mo-edge site and (c) Li\* adsorption on the bridge S site and (d) N<sub>2</sub>\* adsorption on the Mo site and (e) NH<sub>3</sub>\* adsorption on the Mo site and (f) NH<sub>2</sub>\* adsorption on the Mo site and (g) NH<sub>1</sub>\* adsorption on the Mo site.



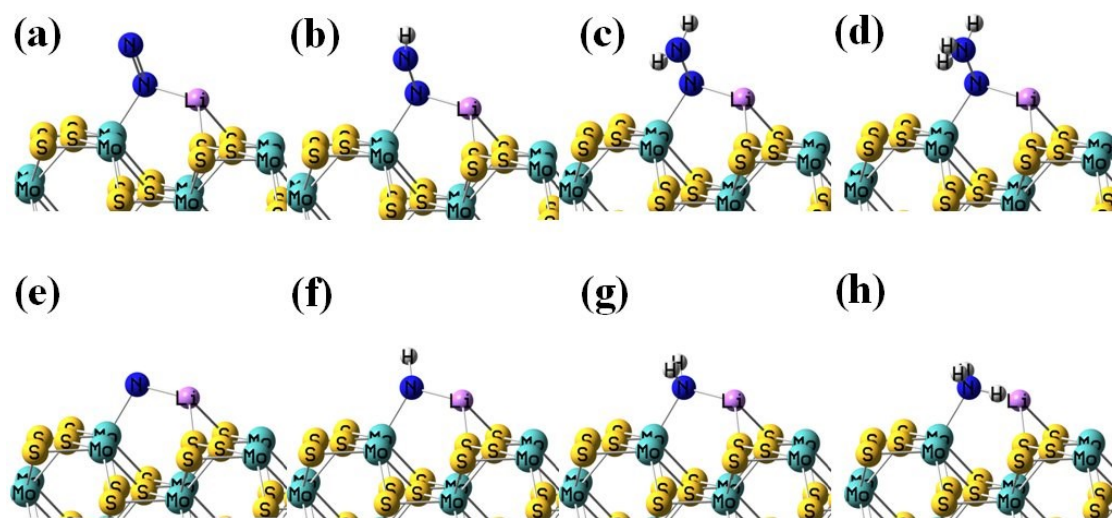

**Figure S15.** The geometries of the initial states (I. S.) for (a) nitrogen adsorption and nitrogen reduction reaction (NRR), the intermediate states (I. M. S.) (b)-(g), and the final states (F. S.), and (h) final states (F.S.) for NH<sub>3</sub> adsorption on the Li-1T-MoS<sub>2</sub>.

**Table S2:** The literatures of other metal sulfide electrocatalysts for NRR in comparison with our work.

| Compounds<br>name                         | Electrolytes                          | RHE<br>(V)  | NH <sub>3</sub> yield rate<br>( $\mu\text{g/h/mg}_{\text{cat}}$ ) | Faradaic<br>efficiency (%) | Ref.           |
|-------------------------------------------|---------------------------------------|-------------|-------------------------------------------------------------------|----------------------------|----------------|
| <b>1T-MoS<sub>2</sub>-Ni</b>              | <b>0.25 M<br/>LiClO<sub>4</sub></b>   | <b>-0.3</b> | <b>1.05<br/><math>\mu\text{g/min/cm}^2</math></b>                 | <b>27.66</b>               | <b>Present</b> |
| <b>Ru-MoS<sub>2</sub></b>                 | 10 mM HCl                             | -0.15       | 0.11 nmol/s/cm <sup>2</sup>                                       | 17.60                      | 1              |
| <b>Co-MoS<sub>2</sub></b>                 | 0.01 H <sub>2</sub> SO <sub>4</sub>   | -0.3        | 0.63 nmol/h/g                                                     | 10.00                      | 2              |
| <b>MoS<sub>2</sub></b>                    | 0.1 M LiSO <sub>4</sub>               | -0.2        | 43.4                                                              | 9.81                       | 3              |
| <b>N-MoS<sub>2</sub></b>                  | 0.1 M Na <sub>2</sub> SO <sub>4</sub> | -0.3        | 69.82                                                             | 9.14                       | 4              |
| <b>DR-MoS<sub>2</sub></b>                 | 0.1 M Na <sub>2</sub> SO <sub>4</sub> | -0.4        | 29.28                                                             | 8.34                       | 5              |
| <b>2H-MoS<sub>2</sub></b>                 | 0.1 M Na <sub>2</sub> SO <sub>4</sub> | -0.5        | 0.08 nmol/s/cm <sup>2</sup>                                       | 1.17                       | 6              |
| <b>MoS<sub>2</sub>-rGO</b>                | 0.1 M LiClO <sub>4</sub>              | -0.45       | 24.82                                                             | 4.56                       | 7              |
| <b>FeS<sub>x</sub>/Fe</b>                 | 0.1 M KOH                             | -0.3        | 0.41 nmol/s/cm <sup>2</sup>                                       | 17.60                      | 8              |
| <b>FeS<sub>2</sub></b>                    | LiSO <sub>4</sub> (pH=2)              | -0.2        | 11.5                                                              | 14.60                      | 9              |
| <b>FeS<sub>2</sub>/CFP</b>                | 0.25 M LiClO <sub>4</sub>             | -0.6        | 0.096 $\mu\text{g/min}$                                           | 14.14                      | 10             |
| <b>Fe<sub>3</sub>S<sub>4</sub></b>        | 0.1 M HCl                             | -0.4        | 75.4                                                              | 6.45                       | 11             |
| <b>Sn/SnS<sub>2</sub></b>                 | 0.1 M PBS                             | -0.7        | 23.8                                                              | 6.50                       | 12             |
| <b>SnS<sub>2</sub>/ZnS<sub>2</sub>@Ni</b> | 0.1 M Na <sub>2</sub> SO <sub>4</sub> | -0.5        | 0.91 nmol/s/cm <sup>2</sup>                                       | 10.80                      | 13             |

## References

1. Suryanto BH, *et al.* MoS<sub>2</sub> polymorphic engineering enhances selectivity in the electrochemical reduction of nitrogen to ammonia. *ACS Energy Letters* **4**, 430-435 (2018).
2. Zhang J, *et al.* Cobalt-Modulated Molybdenum–Dinitrogen Interaction in MoS<sub>2</sub> for Catalyzing Ammonia Synthesis. *Journal of the American Chemical Society* **141**, 19269-19275 (2019).
3. Liu Y, *et al.* Dramatically Enhanced Ambient Ammonia Electrosynthesis Performance by In-Operando Created Li–S Interactions on MoS<sub>2</sub> Electrocatalyst. *Advanced Energy Materials* **9**, 1803935 (2019).
4. Zeng L, Chen S, van der Zalm J, Li X, Chen A. Sulfur vacancy-rich N-doped MoS<sub>2</sub> nanoflowers for highly boosting electrocatalytic N<sub>2</sub> fixation to NH<sub>3</sub> under ambient conditions. *Chemical Communications* **55**, 7386-7389 (2019).
5. Li X, *et al.* Boosted electrocatalytic N<sub>2</sub> reduction to NH<sub>3</sub> by defect-rich MoS<sub>2</sub> nanoflower. *Advanced Energy Materials* **8**, 1801357 (2018).
6. Zhang L, *et al.* Electrochemical ammonia synthesis via nitrogen reduction reaction on a MoS<sub>2</sub> catalyst: theoretical and experimental studies. *Advanced Materials* **30**, 1800191 (2018).
7. Li X, *et al.* A MoS<sub>2</sub> nanosheet–reduced graphene oxide hybrid: an efficient electrocatalyst for electrocatalytic N<sub>2</sub> reduction to NH<sub>3</sub> under ambient conditions. *Journal of materials chemistry A* **7**, 2524-2528 (2019).
8. Xiong W, Guo Z, Zhao S, Wang Q, Xu Q, Wang X. Facile, cost-effective plasma synthesis of self-supportive FeS<sub>x</sub> on Fe foam for efficient electrochemical reduction of N<sub>2</sub> under ambient conditions. *Journal of Materials Chemistry A* **7**, 19977-19983 (2019).
9. Feng D, Zhang X, Sun Y, Ma T. Surface-defective FeS<sub>2</sub> for electrochemical NH<sub>3</sub> production under ambient conditions. *Nano Materials Science*, (2019).
10. Chang CC, *et al.* Photoactive Earth-Abundant Iron Pyrite Catalysts for Electrocatalytic

Nitrogen Reduction Reaction. *Small* **15**, 1904723 (2019).

11. Zhao X, Lan X, Yu D, Fu H, Liu Z, Mu T. Deep eutectic-solvothermal synthesis of nanostructured Fe<sub>3</sub>S<sub>4</sub> for electrochemical N<sub>2</sub> fixation under ambient conditions. *Chemical communications* **54**, 13010-13013 (2018).
12. Li P, *et al.* Amorphous Sn/Crystalline SnS<sub>2</sub> Nanosheets via In Situ Electrochemical Reduction Methodology for Highly Efficient Ambient N<sub>2</sub> Fixation. *Small* **15**, 1902535 (2019).
13. Chen X, Liu Y-T, Ma C, Yu J, Ding B. Self-organized growth of flower-like SnS<sub>2</sub> and forest-like ZnS nanoarrays on nickel foam for synergistic superiority in electrochemical ammonia synthesis. *Journal of Materials Chemistry A* **7**, 22235-22241 (2019).
